# Supplementary material for: The selection force weakens with age because ageing evolves and not vice versa
Source: PubMed Central journal article supplement (PMC8813929; doi:10.1038/s41467-022-28254-3), 2022-02-03
Supplement: 41467_2022_28254_MOESM3_ESM.pdf [file 41467_2022_28254_MOESM3_ESM.pdf]

### **Description of Additional Supplementary Files**

File Name: Supplementary Code 1

Description: This file contains R code embedded in a R Markdown file. The code reproduces Fig. 1 in the main text and all figures in the Supporting Methods file (except Fig.SI.1)
